# Supplementary material for: Soil Microbial Community Responses to Different Management Strategies in Almond Crop
Source: Preprints.org preprint supplement (doi:10.20944/preprints202212.0563.v1), 2022-12-29
Supplement: Supplementary file 1 [file supplementary]

Archive with 10 entries (10 files):
- S2_FigureS2.docx
- __MACOSX/._S2_FigureS2.docx
- S5_FigureS5_vennDiagram.pdf
- __MACOSX/._S5_FigureS5_vennDiagram.pdf
- S1_TableS1.xlsx
- __MACOSX/._S1_TableS1.xlsx
- S3_TableS3_rel-ab_fungi.xlsx
- __MACOSX/._S3_TableS3_rel-ab_fungi.xlsx
- S4_TableS4_rel-ab_bact.xlsx
- __MACOSX/._S4_TableS4_rel-ab_bact.xlsx
