# Supplementary material for: Soil Microbial Community Responses to Different Management Strategies in Almond Crop
Source: Preprints.org preprint supplement (doi:10.20944/preprints202212.0563.v1), 2022-12-29
Supplement: Supplementary file 1 [file supplementary › S1_TableS1.xlsx]

## Sheet: SM1
Table 1S: Sample IDs, Qubit quantification values, and number of raw reads and sequences obtained per sample. * Number of raw reads from paired-end sequencing, i.e., forward (R1) reads or reverse (R2) reads. ♣ DNA extraction and PCR negative controls (Bex and BPCR) reads
Microorganism	Soil management	Sample ID	DNA concentration (ng/μL)	qPCRquantification (relative 16S or ITS copies per gram of soil)	Raw reads*	Filtered reads	Denoised reads	Merged reads	Non-chimeric sequences
bacteria	Organic	OM1	13	124720	102018	95555	90473	85987	83526
		OM2	4.38	43008	100030	93793	89193	83503	81479
		OM3	4.86	52740	117226	109698	104051	96895	94664
	Conventional	CM1	2.76	26772	126903	117721	112462	105606	103091
		CM2	2.38	26032	86542	80895	75992	70596	69052
		CM3	2.98	28028	111846	104101	98813	92903	90903
	No management	NM1	5.4	51264	96601	89910	86178	81738	78606
		NM2	4.8	47876	100519	91535	87756	82814	79289
		NM3	4.22	71004	92797	86332	82237	77579	75176
	Negative controls	Bex ♣	n.a.	n.a.	80	65	15	15	15
		BPCR ♣	n.a.	n.a.	35	27	2	2	2
		TOTAL			934482	869540	827155	777621	755786
fungi	Organic	OM1	13	106.13	72757	67567	66365	65225	60590
		OM2	4.38	19.16	57496	53116	51857	49626	49425
		OM3	4.86	59.93	69544	63982	62832	60801	60042
	Conventional	CM1	2.76	0.11	75447	67011	66006	62662	61641
		CM2	2.38	4.99	86257	79468	78445	76737	75207
		CM3	2.98	1.04	63430	57818	56725	54383	54131
	No management	NM1	5.4	0.41	58589	54595	53618	49332	49236
		NM2	4.8	0.82	66425	61288	60206	56943	56616
		NM3	4.22	4.46	82717	76676	75775	72430	65722
	Negative controls	Bex ♣	n.a.	n.a.	206	34	17	17	17
		BPCR ♣	n.a.	n.a.	230	24	1	0	0
					632662	581521	571829	548139	532610
