# Supplementary material for: Soil Microbial Community Responses to Different Management Strategies in Almond Crop
Source: Preprints.org preprint supplement (doi:10.20944/preprints202212.0563.v1), 2022-12-29

Figure S5: Venn diagram with shared and exclude genera. Bacterial (A) and fungal (B) genera present in the three soil replicas across managements.

**A. Bacteria**

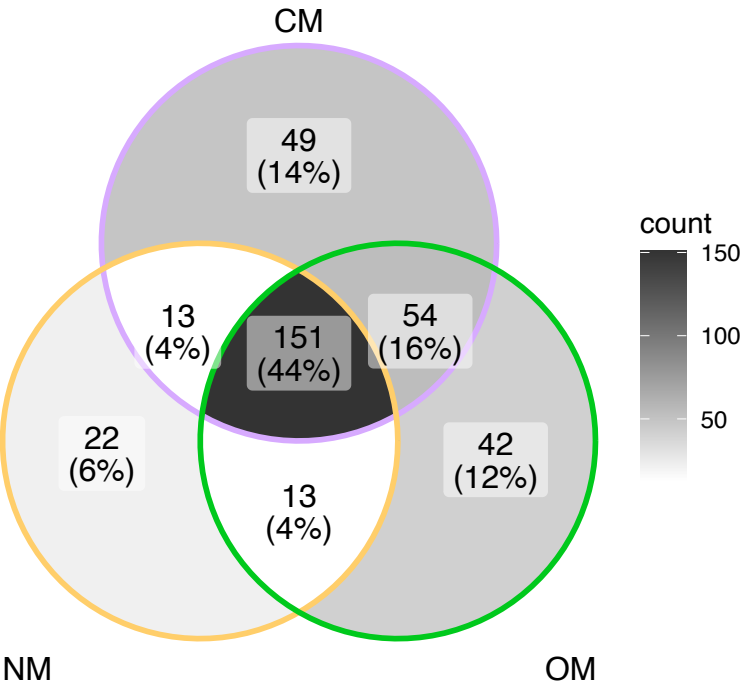

**B. Fungi**

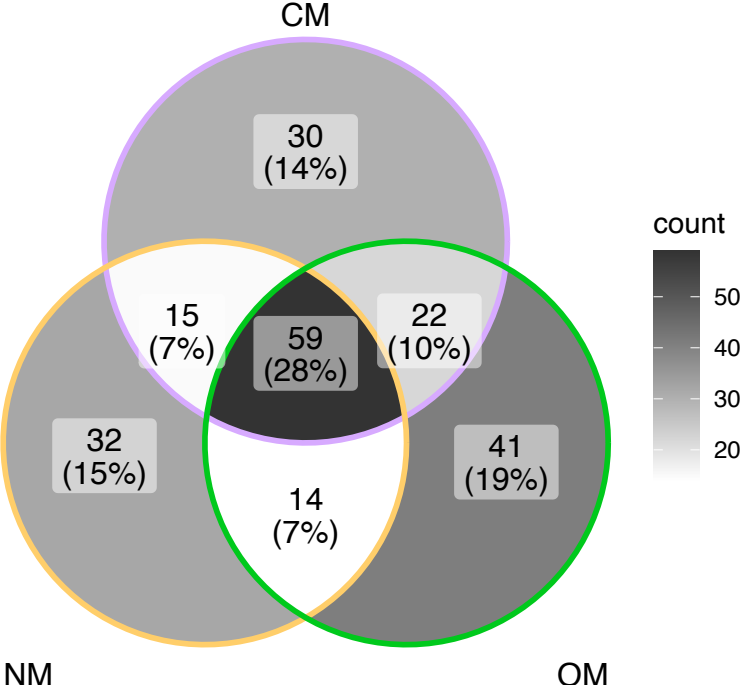

Supplement: Supplementary file 1 [file supplementary › S5_FigureS5_vennDiagram.pdf]
