# Supplementary figures and images for: Soil Microbial Community Responses to Different Management Strategies in Almond Crop
Source: Preprints.org preprint supplement (doi:10.20944/preprints202212.0563.v1), 2022-12-29

Figure S2: Rarefaction curves. Rarefaction curves on (A) 16S and (B) ITS datasets.

A


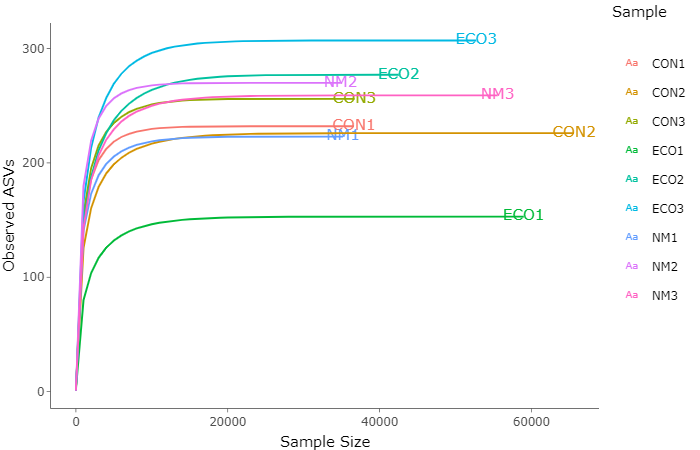


B


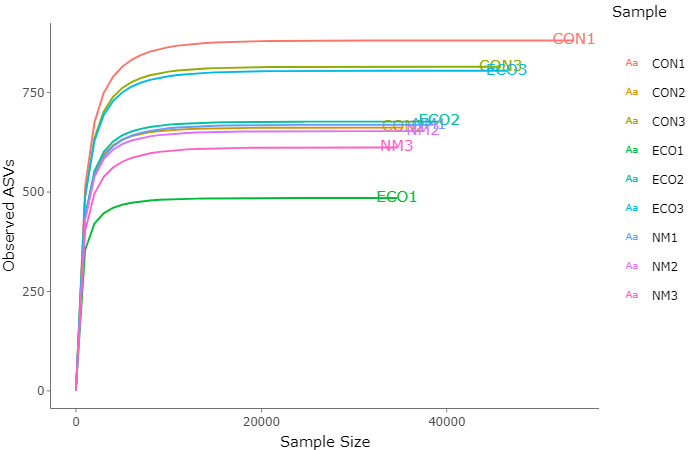

Supplement: Supplementary file 1 [file supplementary › S2_FigureS2.docx]
